# Supplementary material for: Highly luminescent and ultrastable cesium lead bromide perovskite patterns generated in phosphate glass matrices
Source: Royal Society of Chemistry journal article supplement (doi:10.1039/d0nr03254a), 2020-01-01
Supplement: d0nr03254a1.pdf [file d0nr03254a1.pdf]

## Supporting Information

### Highly luminescent and ultrastable cesium lead bromide perovskite patterns generated into phosphate glass matrices

Ioannis Konidakis\*<sup>1</sup>, Konstantinos Brintakis<sup>1</sup>, Athanasia Kostopoulou<sup>1</sup>, Ioanna Demeridou<sup>1,2</sup>, Paraskevi Kavatzikidou<sup>1</sup>, Emmanuel Stratakis\*<sup>1,2</sup>

*<sup>1</sup>Institute of Electronic Structure and Laser (IESL), Foundation for Research and Technology-Hellas (FORTH), 71110 Heraklion, Crete, Greece*

*<sup>2</sup>Physics Department, University of Crete, 71003 Heraklion, Crete, Greece*

**\*Corresponding authors:**

+30-2810-391835, email: [ikonid@iesl.forth.gr](mailto:ikonid@iesl.forth.gr)

+30-2810-391274, email: [stratak@iesl.forth.gr](mailto:stratak@iesl.forth.gr)

## SI Figures

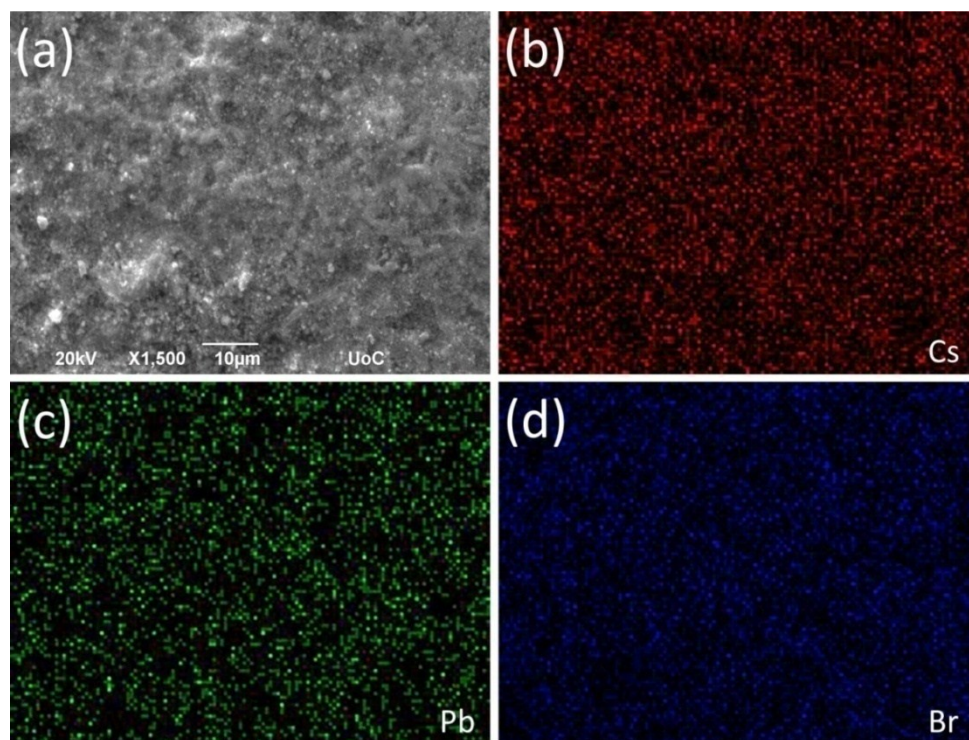

**Fig. S1:** (a) Representative SEM image of the surface of PvG-L glass, and corresponding EDS elemental mapping analysis for Cs (b), Pb (c), and Br (d).

The elemental mapping analysis reveals a homogeneous distribution of the perovskite elements across the depicted area. The ratio of Cs:Pb:Br is found 3.6:1:5.6, i.e. close to  $\text{Cs}_4\text{PbBr}_6$  stoichiometry.

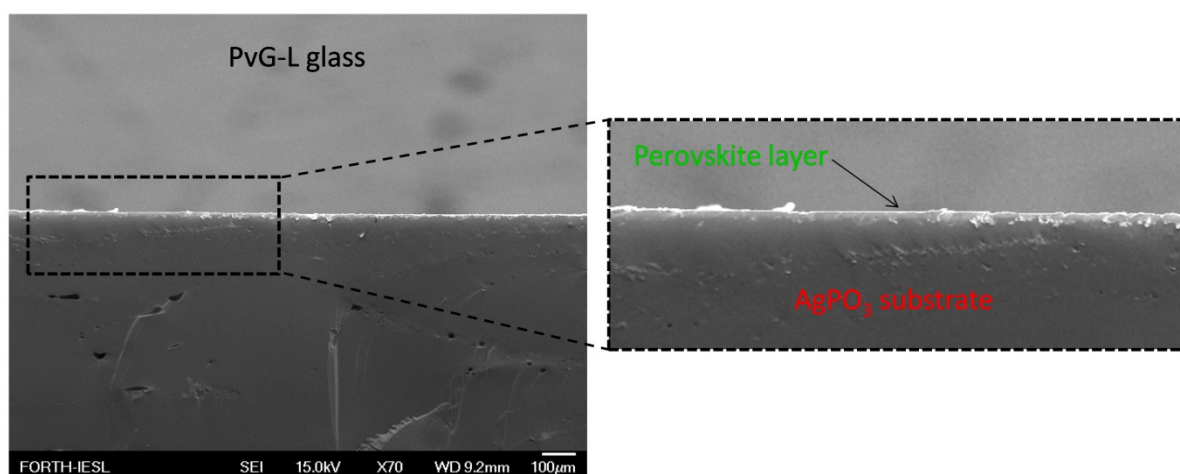

**Fig. S2:** Indicative cross-section SEM photos of PvG-L sample.

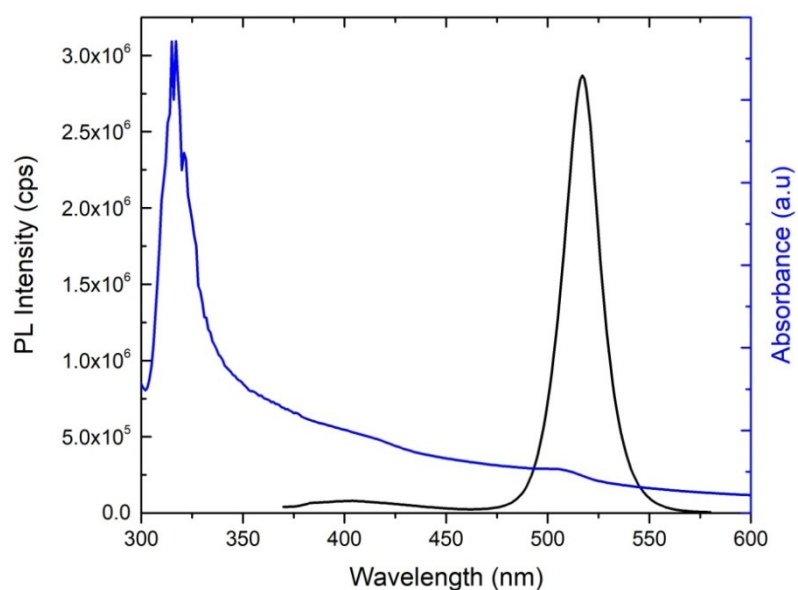

**Fig. S3:** Photoluminescence (black line) and optical absorbance (blue line) of the as prepared perovskite nanocrystals dispersion.

The PL peak at 517 nm corresponds to the  $\text{CsPbBr}_3$  orthorhombic phase. The dispersion exhibits two absorbing features, one from 300 to 350 nm that is attributed to the  $\text{Cs}_4\text{PbBr}_6$  rhombohedral phase, and a weaker absorption profile at the vicinity of 505 nm that is due to the  $\text{CsPbBr}_3$  orthorhombic phase.

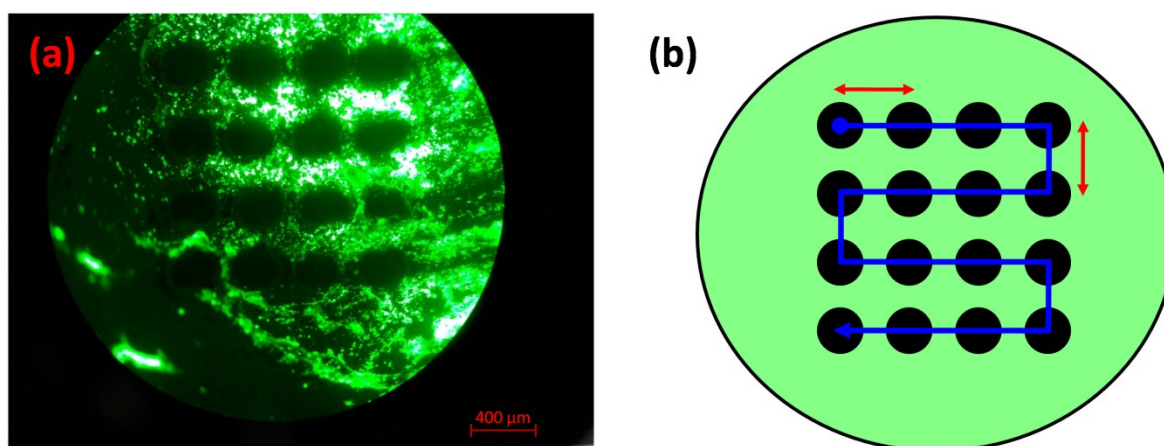

**Fig. S4:** Schematic representation of the laser irradiation pathway for the formation of the encapsulated luminescent patterns.

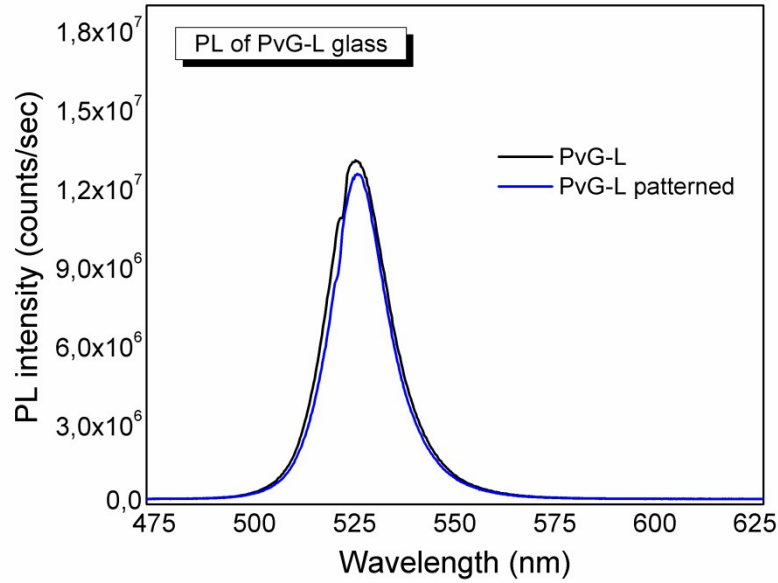

**Fig. S5:** Photoluminescence spectra of PvG-L glass before and after laser processing, with the latter PL spectrum collected from a non-irradiated region between the dark dots of the micropattern shown in Fig. 8c.

**SI Video**

**Vid. S1:** Photoluminescence of PvG-C sample following excitation with the 473 nm diode-pumped solid-state (DPSS) Nd:YAG laser of the micro-photoluminescence ( $\mu$ -PL) setup. The video illustrates the transition of green photoluminescence upon moving the blue laser inside and outside the confined perovskite core region of the PvG-C glass.
